# Supplementary material
Source: PubMed Central journal article supplement (PMC2837910)
Supplement: NIHMS179127-supplement-Supplementary_tables.pdf [file NIHMS179127-supplement-Supplementary_tables.pdf]

Table 1 (Supplementary material). Means and standard deviations (in parentheses) calculated for bone volume fractions (BV/TV), anisotropy and trabecular thickness (Tb.Th) in the study determining error in selecting and placing ROIs and VOIs with precision and repeatability.

| <b>Specimen</b> | <b>Species</b> | <b>BV/TV</b> | <b>Anisotropy</b> | <b>Tb.Th</b> |
|-----------------|----------------|--------------|-------------------|--------------|
| 54330           | <i>Pan</i>     | 0.32 (0.04)  | 1.92 (0.09)       | 0.29 (0.03)  |
| W141            | <i>Papio</i>   | 0.29 (0.03)  | 2.40 (0.46)       | 0.27 (0.01)  |
| 820648          | <i>Homo</i>    | 0.18 (0.009) | 3.39 (0.39)       | 0.26 (0.009) |
| 820735          | <i>Homo</i>    | 0.43 (0.03)  | 2.20 (0.23)       | 0.38 (0.04)  |
| 821205          | <i>Homo</i>    | 0.29 (0.04)  | 3.39 (0.38)       | 0.23 (0.01)  |
| 820696          | <i>Homo</i>    | 0.45 (0.01)  | 2.53 (0.37)       | 0.48 (0.02)  |

Table 2 (Supplementary material). Image resolutions, bone volume fractions, anisotropy and trabecular thickness for each specimen included in this study. These data indicate that variation in image resolution has minimal impact on the results discussed in the body of the paper.

| Specimen | Sex    | Species           | Pixel Size (X, Y) | Slice Thickness (Z) | BV/TV | Anisotropy | Tb.Th |
|----------|--------|-------------------|-------------------|---------------------|-------|------------|-------|
| 820735   | male   | <i>H. sapiens</i> | 0.078             | 0.088               | 0.210 | 2.770      | 0.280 |
| 821221   | male   | <i>H. sapiens</i> | 0.078             | 0.088               | 0.360 | 1.860      | 0.380 |
| 820648   | male   | <i>H. sapiens</i> | 0.078             | 0.088               | 0.380 | 2.320      | 0.380 |
| 820726   | male   | <i>H. sapiens</i> | 0.078             | 0.088               | 0.310 | 2.580      | 0.420 |
| 820227   | female | <i>H. sapiens</i> | 0.078             | 0.088               | 0.210 | 2.080      | 0.340 |
| 820696   | female | <i>H. sapiens</i> | 0.078             | 0.088               | 0.280 | 2.140      | 0.430 |
| 821205   | female | <i>H. sapiens</i> | 0.062             | 0.070               | 0.220 | 2.780      | 0.260 |
| 821211   | female | <i>H. sapiens</i> | 0.062             | 0.070               | 0.330 | 2.170      | 0.350 |
| 176216   | male   | <i>G. gorilla</i> | 0.082             | 0.092               | 0.180 | 1.750      | 0.340 |
| 176208   | male   | <i>G. gorilla</i> | 0.082             | 0.092               | 0.190 | 3.030      | 0.280 |
| 176209   | male   | <i>G. gorilla</i> | 0.082             | 0.092               | 0.230 | 2.830      | 0.660 |
| 176220   | male   | <i>G. gorilla</i> | 0.082             | 0.092               | 0.180 | 4.250      | 0.400 |
| 54327    | female | <i>G. gorilla</i> | 0.105             | 0.122               | 0.350 | 1.820      | 0.420 |
| 167330   | female | <i>G. gorilla</i> | 0.083             | 0.094               | 0.190 | 2.840      | 0.270 |
| 167337   | female | <i>G. gorilla</i> | 0.078             | 0.088               | 0.210 | 3.530      | 0.340 |
| 81652    | female | <i>G. gorilla</i> | 0.087             | 0.099               | 0.280 | 2.910      | 0.510 |

|        |        |                       |       |       |       |       |       |
|--------|--------|-----------------------|-------|-------|-------|-------|-------|
| 141    | male   | <i>P.h. anubis</i>    | 0.064 | 0.072 | 0.360 | 2.140 | 0.300 |
| 174    | male   | <i>P.h. anubis</i>    | 0.064 | 0.072 | 0.270 | 1.730 | 0.310 |
| 9039   | female | <i>P.h. anubis</i>    | 0.061 | 0.067 | 0.370 | 1.780 | 0.290 |
| 9740   | female | <i>P.h. anubis</i>    | 0.061 | 0.067 | 0.240 | 1.750 | 0.400 |
| 2889   | female | <i>P.h. anubis</i>    | 0.061 | 0.067 | 0.310 | 1.960 | 0.180 |
| 6649   | female | <i>P.h. anubis</i>    | 0.061 | 0.067 | 0.440 | 1.900 | 0.300 |
| 167344 | male   | <i>P. troglodytes</i> | 0.075 | 0.084 | 0.290 | 1.480 | 0.320 |
| 167341 | male   | <i>P. troglodytes</i> | 0.069 | 0.078 | 0.400 | 1.790 | 0.300 |
| 167346 | male   | <i>P. troglodytes</i> | 0.066 | 0.074 | 0.180 | 2.070 | 0.260 |
| 54330  | male   | <i>P. troglodytes</i> | 0.073 | 0.083 | 0.300 | 1.890 | 0.270 |
| 167343 | female | <i>P. troglodytes</i> | 0.063 | 0.071 | 0.290 | 1.560 | 0.300 |
| 201469 | female | <i>P. troglodytes</i> | 0.067 | 0.078 | 0.280 | 1.950 | 0.290 |
| 90293  | female | <i>P. troglodytes</i> | 0.067 | 0.077 | 0.150 | 1.870 | 0.220 |
| 90191  | female | <i>P. troglodytes</i> | 0.075 | 0.089 | 0.230 | 2.100 | 0.260 |
